# Supplementary material for: Solid-state silicon nanoparticles with color-tunable photoluminescence and multifunctional applications
Source: Royal Society of Chemistry journal article supplement (doi:10.1039/c9tc00938h), 2019-01-01
Supplement: c9tc00938h1.pdf [file c9tc00938h1.pdf]

**Solid-State Silicon Nanoparticles with Color-Tunable  
Photoluminescence and Multifunctional Applications**

**Ting Gong<sup>‡</sup>, Yanjuan Li<sup>‡</sup>, Bingfu Lei<sup>\*</sup>, Xuejie Zhang, Yingliang Liu, and Haoran  
Zhang<sup>\*</sup>**

*Guangdong Provincial Engineering Technology Research Center for Optical  
Agriculture, College of Materials and Energy, South China Agricultural University,  
Guangzhou 510642, P. R. China*

<sup>‡</sup>These authors have contributed equally to this work.

<sup>\*</sup>Corresponding authors. E-mail: [tleibf@scau.edu.cn](mailto:tleibf@scau.edu.cn) (B. Lei); [hrzhang@scau.edu.cn](mailto:hrzhang@scau.edu.cn)  
(H. Zhang).

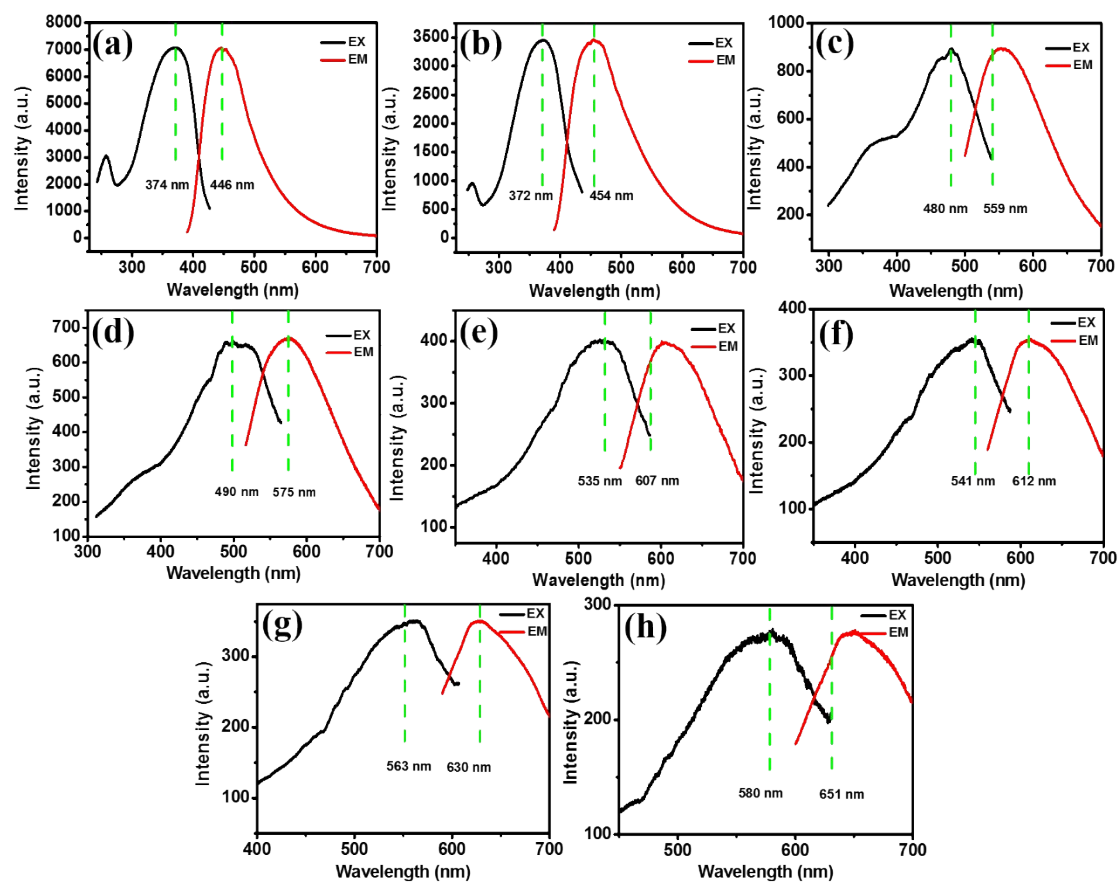

**Figure S1.** The optimal emission and excitation wavelengths of SSF-2 (a), SSF-6 (b), SSF-10 (c), SSF-20 (d), SSF-30 (e), SSF-60 (f), SSF-120 (g) and SSF-180 (h), respectively.

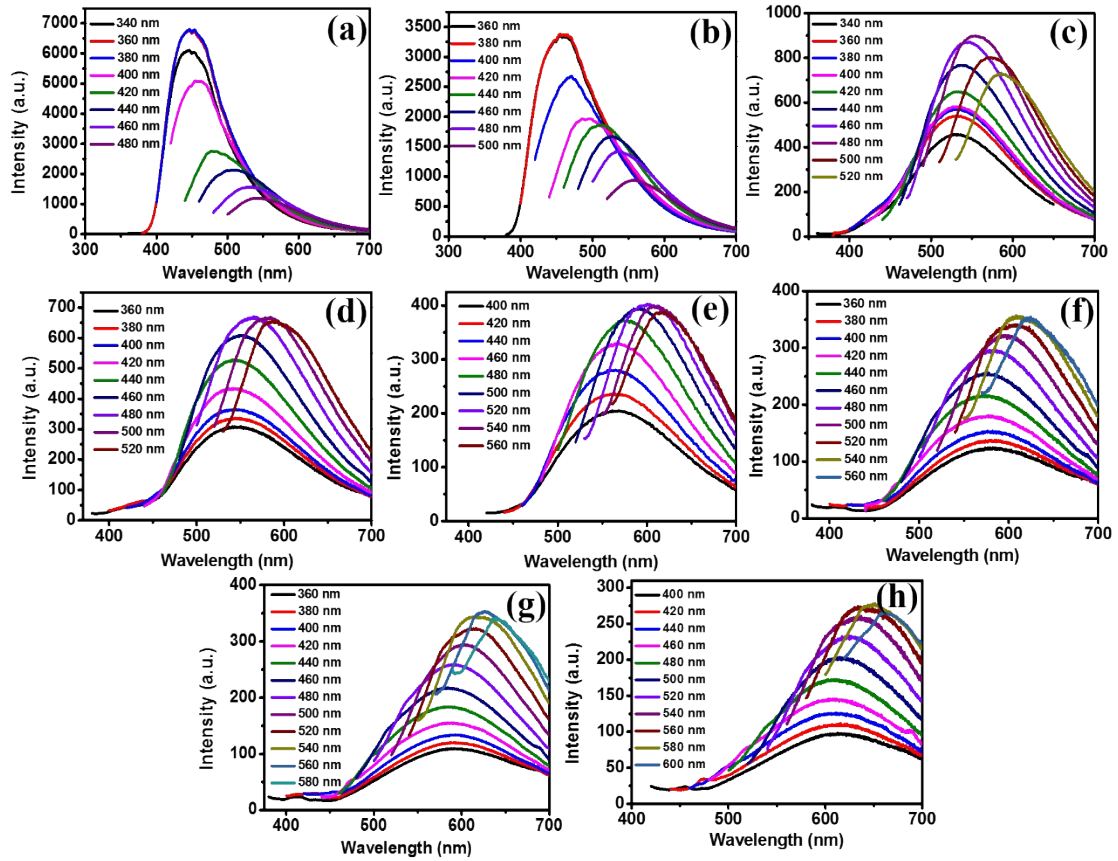

**Figure S2.** PL spectra of SSF-2 (a), SSF-6 (b), SSF-10 (c), SSF-20 (d), SSF-30 (e), SSF-60 (f), SSF-120 (g) and SSF-180 (h) recorded under the excitation of different wavelengths, respectively.

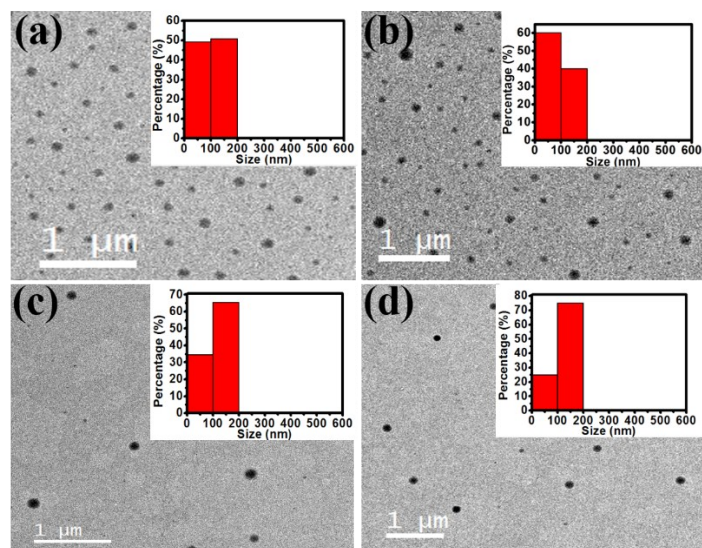

**Figure S3.** TEM images and size distributions of SSF-2 (a), SSF-10 (b), SSF-120 (c) and SSF-180 (d), respectively.

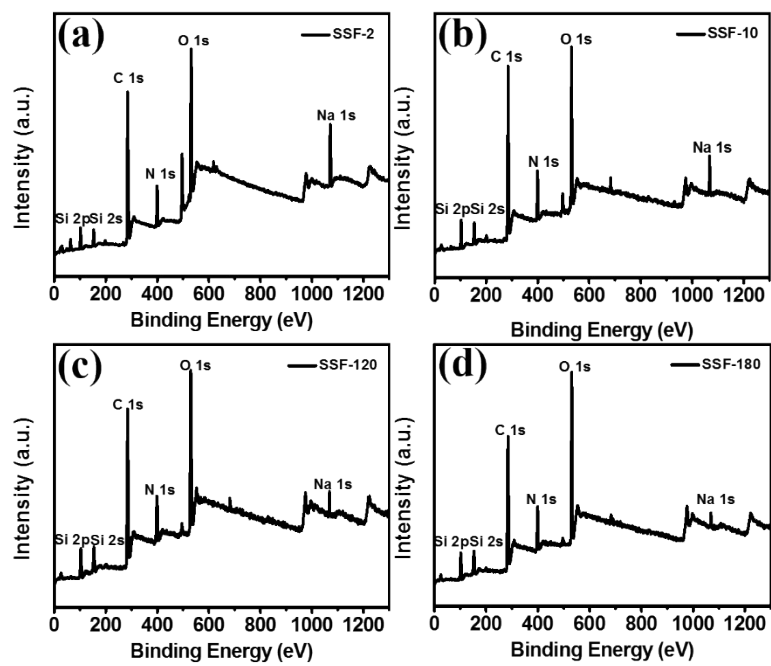

**Figure S4.** Survey XPS spectra of SSF-2 (a), SSF-10 (b), SSF-120 (c) and SSF-180 (d), respectively.

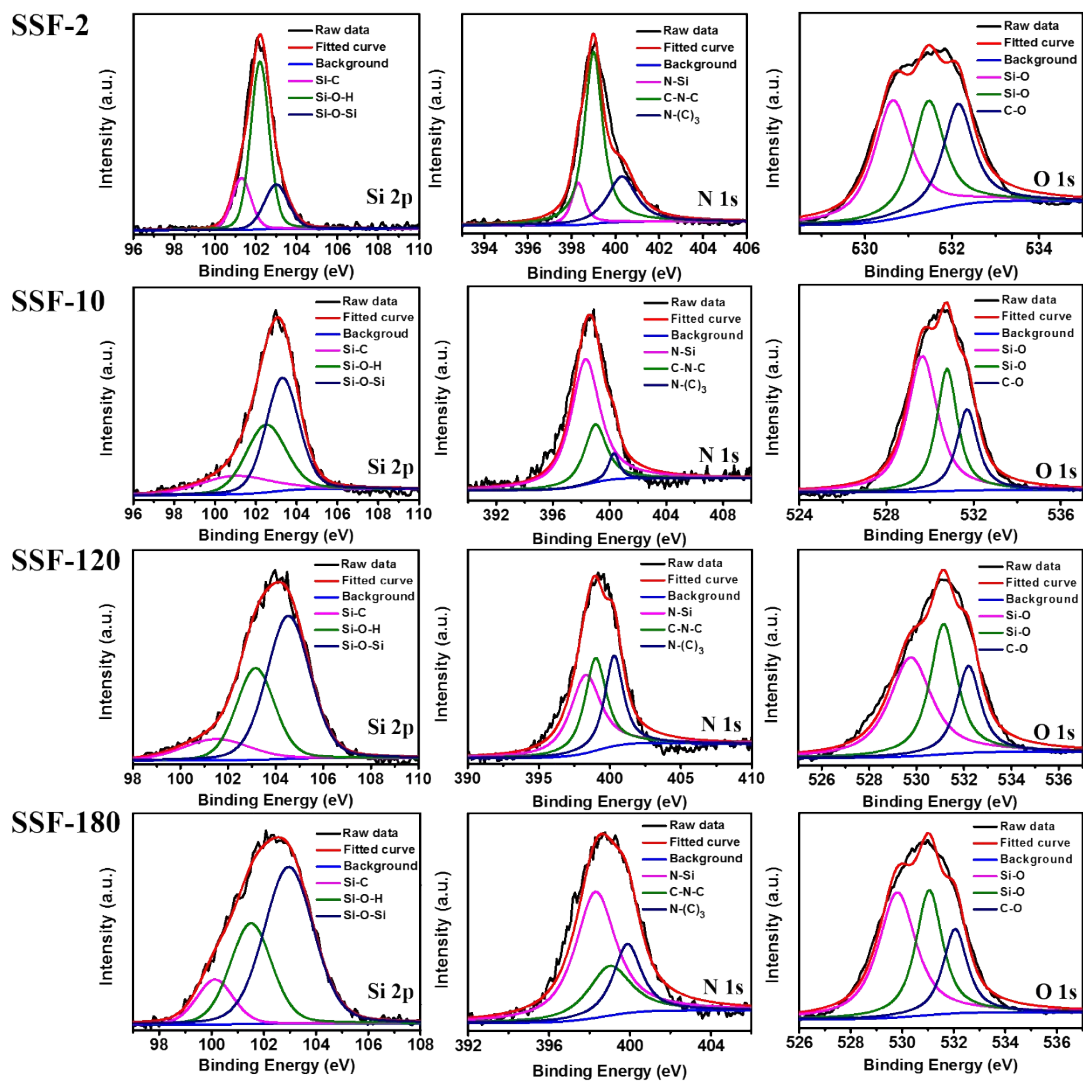

**Figure S5.** High-resolution XPS Si2p, N1s, and O1s spectra of the four typical Si NPs powders (SSF-2, SSF-10, SSF-120 and SSF-180).

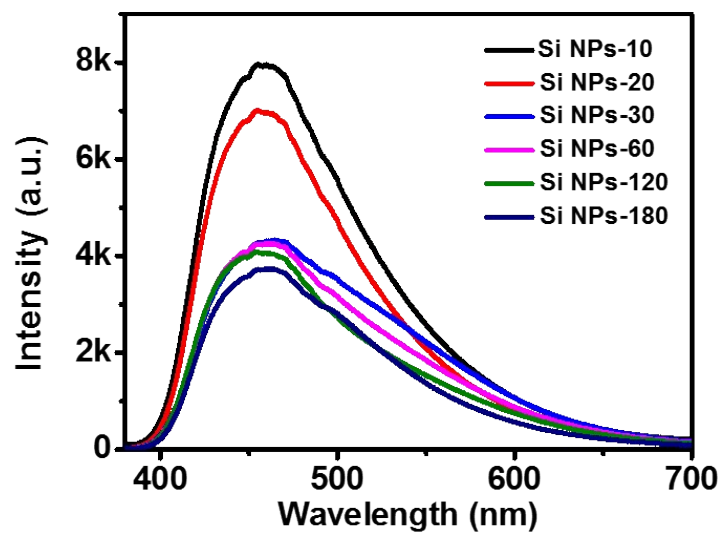

Figure S6. PL spectra of the Group III powders.

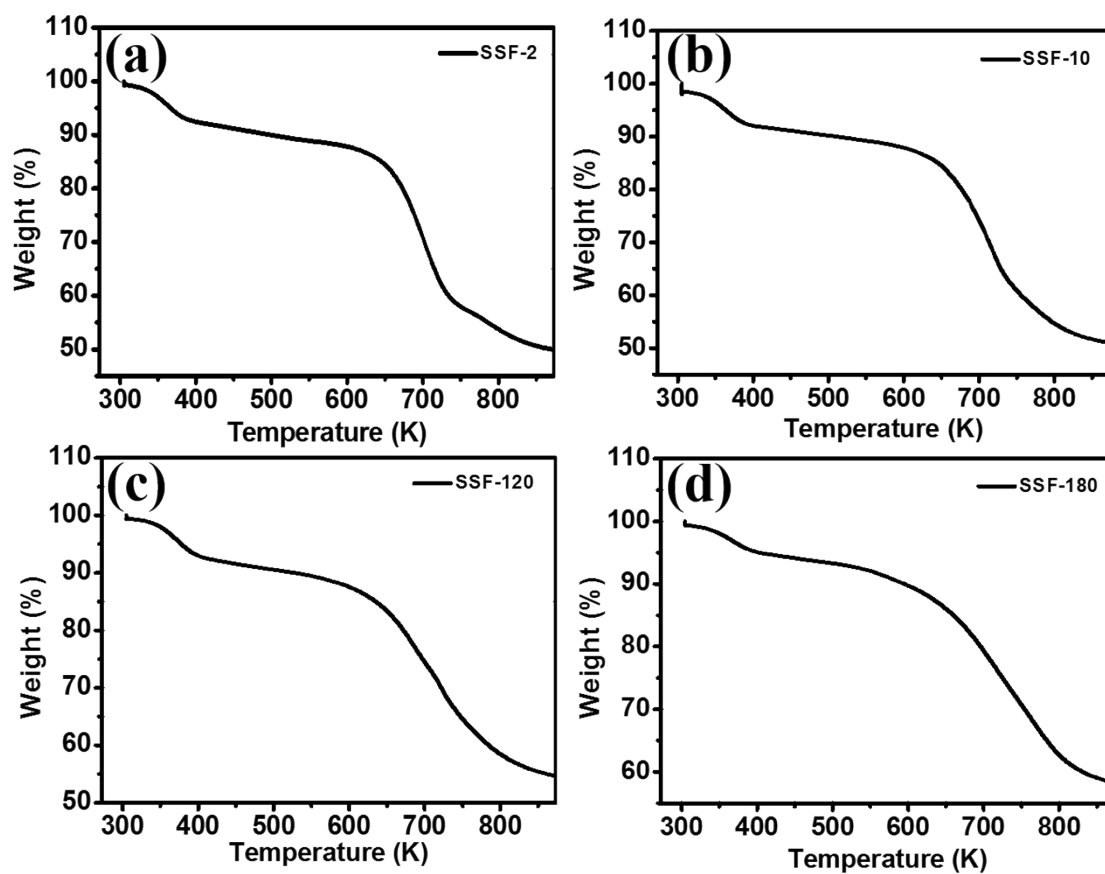

**Figure S7.** TGA thermograms of SSF-2 (a), SSF-10 (b), SSF-120 (c) and SSF-180 (d), respectively.



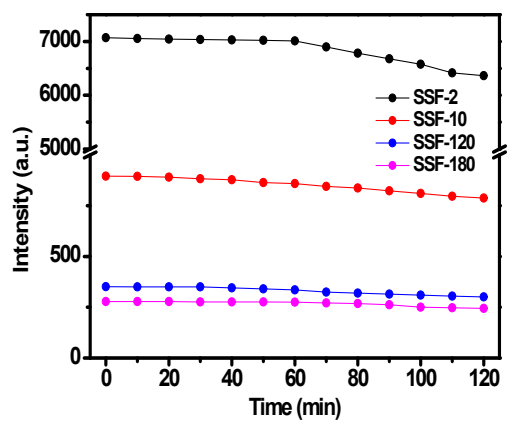

**Figure S8.** The fluorescent intensities of SSF-2, SSF-10, SSF-120 and SSF-180 exposed to UV light (365 nm).

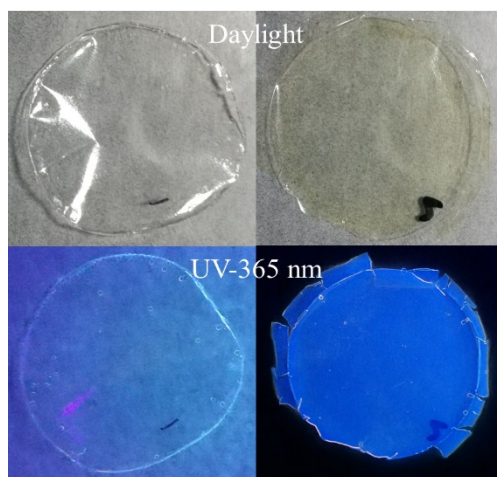

**Figure S9.** Photographs of the pure cellulose films (left) and CMC/SSF-2 films (right) under daylight (top) and UV light of 365 nm (down), respectively.

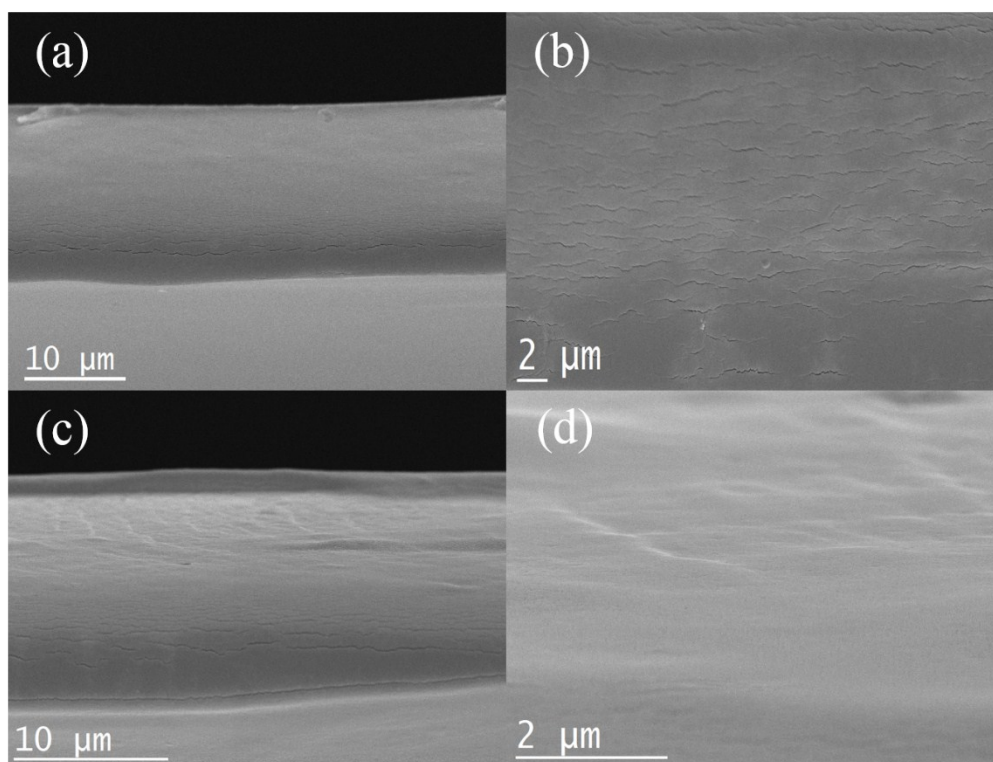

**Figure S10.** The cross-sections of cellulose films and CMC/SSF-2 films.

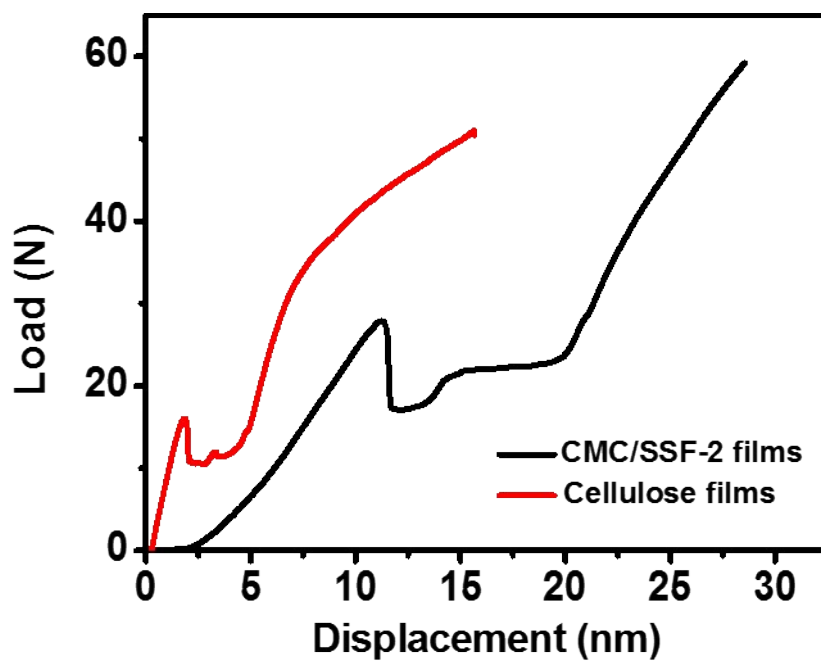

**Figure S11.** Stretching coefficient diagram of cellulose films and CMC/SSF-2 films.

**Table S1.** PLQY of the Group I powders.

| Samples  | SSF-2 | SSF-6 | SSF-10 | SSF-20 | SSF-30 | SSF-60 | SSF-120 | SSF-180 |
|----------|-------|-------|--------|--------|--------|--------|---------|---------|
| PLQY (%) | 21.50 | 12.33 | 5.00   | 3.85   | 3.84   | 2.25   | 1.59    | 1.28    |

**Table S2.** The optimal excitation and emission wavelengths of the Group II powders.

| Samples        | Temperature (K) | Time (min) | EX (nm) | EM (nm) |
|----------------|-----------------|------------|---------|---------|
|                | 373             |            | 371     | 446     |
|                | 423             |            | 370     | 454     |
| Si NPs powders | 473             | 10         | 479     | 550     |
|                | 523             |            | 520     | 631     |
|                | 573             |            | 540     | 669     |

**Table S3.** The atomic ratio between oxygen and carbon of the Group II powders.

| Samples | C      | N      | O      | Si     | O/C  |
|---------|--------|--------|--------|--------|------|
| SSF-373 | 58.73% | 13.09% | 19.63% | 8.55%  | 0.33 |
| SSF-423 | 54.78% | 13.08% | 21.92% | 10.23% | 0.40 |
| SSF-473 | 54.26% | 11.04% | 23.78% | 10.93% | 0.44 |
| SSF-523 | 52.12% | 8.27%  | 27.95% | 11.67% | 0.54 |
| SSF-573 | 43.07% | 9.19%  | 33.25% | 14.49% | 0.77 |
